# Supplementary material for: TANGO1 membrane helices create a lipid diffusion barrier at curved membranes
Source: eLife journal article supplement (doi:10.7554/elife.57822), 2020-05-26
Supplement: figures [file elife-57822-figures-v2.pdf]

---

## Figures and figure supplements

TANGO1 membrane helices create a lipid diffusion barrier at curved membranes

**Ishier Raote et al**

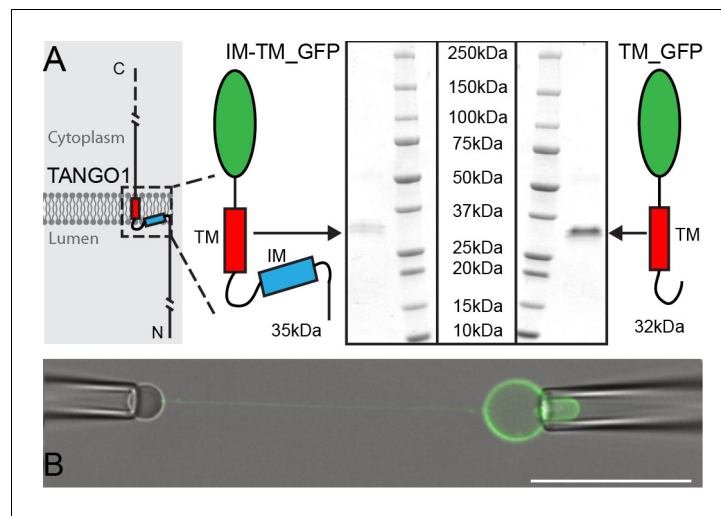

**Figure 1.** Micromanipulation of TANGO1 transmembrane-domain minimal constructs reconstituted into GUVs. **(A)** The two constructs used in this study. Schematics and Coomassie gels of the purified proteins with either both hydrophobic helices (Intramembrane IM, and transmembrane TM) tagged with monomeric superfolder EGFP (IM-TM\_GFP left), or the transmembrane alone with the same EGFP tag (TM\_GFP right). **(B)** The proteins (green) were reconstituted into GUVs and a second pipette with a biotin-tagged bead was used to pull a tube from the surface of the GUV. Scale bar 25 μm.

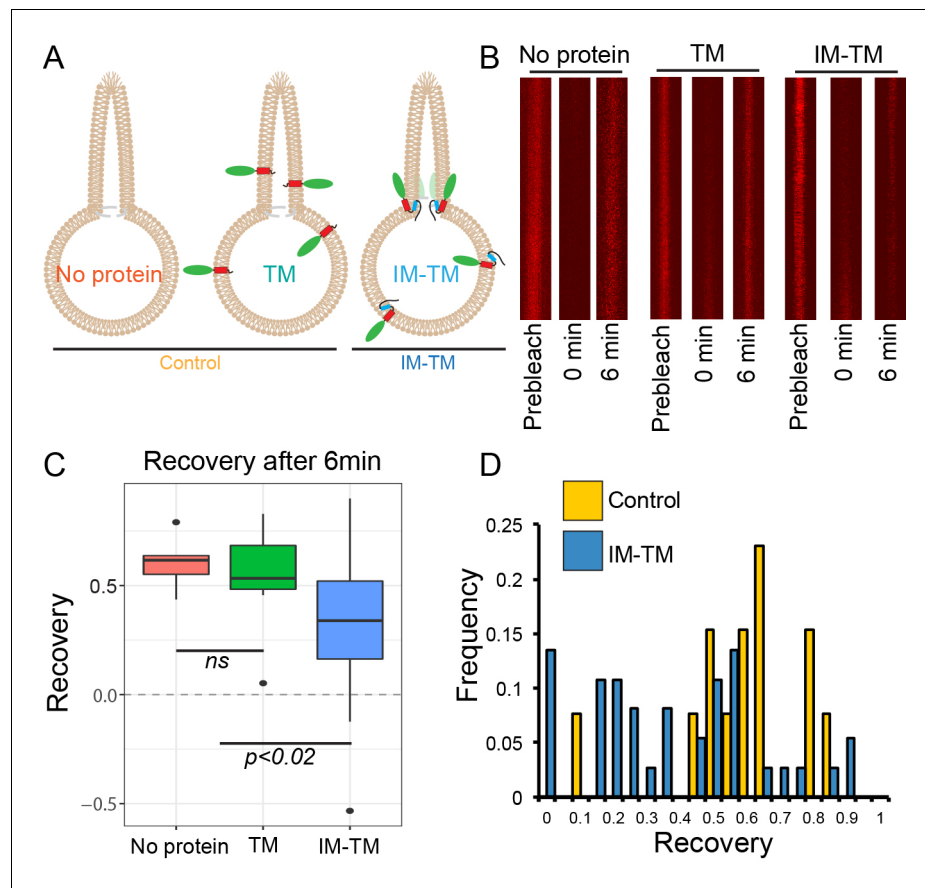

**Figure 2.** TANGO1 helices are a barrier to diffusion of lipids. (A) Schematic of the three conditions (no protein, TM, IM-TM) with protein reconstitution into a GUV showing a tube pulled from the GUV; (B) Atto647N-labelled lipids visualised in the pulled tube in all three conditions, before bleaching (prebleach), then immediately after bleaching (0 min) and six minutes later (6 min). (C) Box plot quantification of the fluorescence recovery after 6 min; (D) Frequency histogram showing the extent of fluorescence recovery in tubes pulled from GUVs with no protein or TM pooled (yellow) or GUVs with TM\_IM (blue). Most trials with low recovery rates were those where tubes were pulled from GUVs with IM-TM (blue line vs green and red lines). ns – not significant or  $p < 0.02$  by ANOVA.

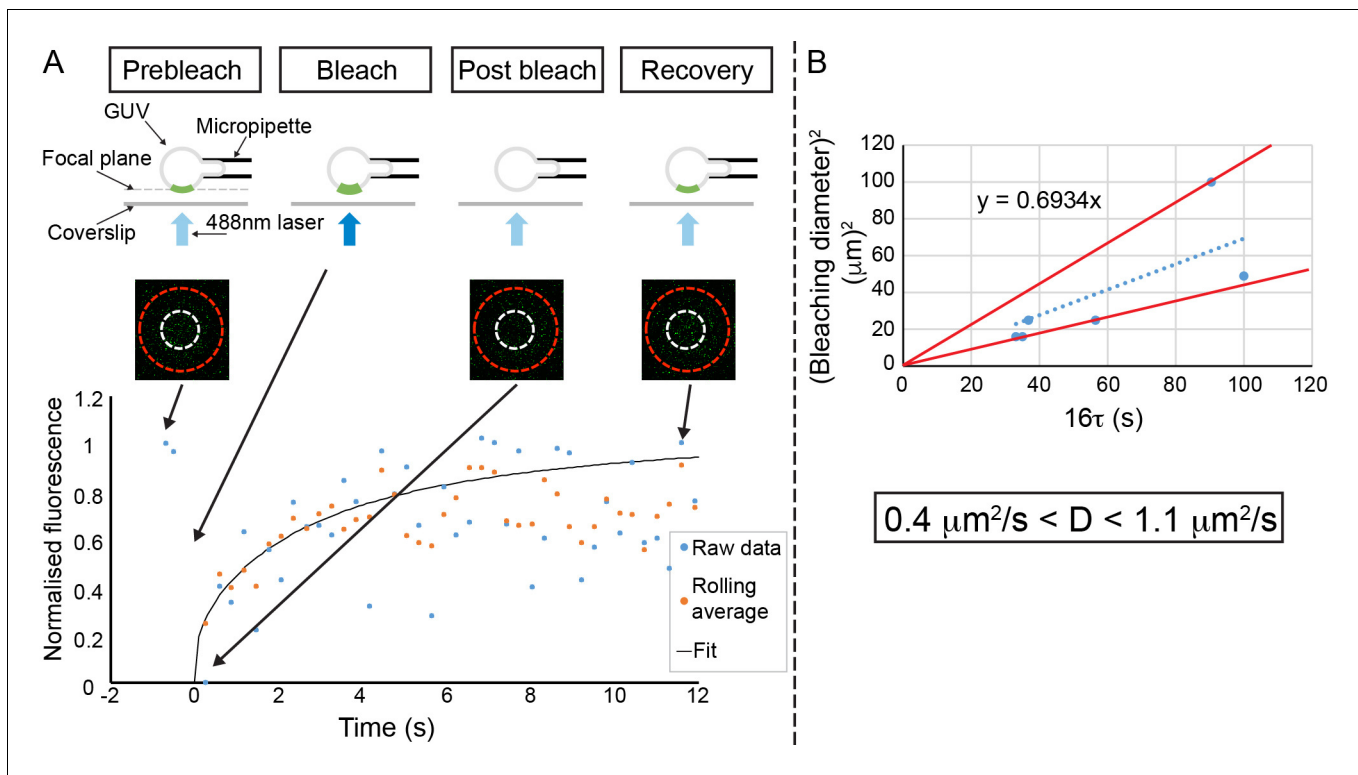

**Figure 2—figure supplement 1.** IM-TM diffuses freely. (A) Schematic of the experiment. A bottom pole of a micromanipulated GUV is placed in the focal plane of the confocal microscope. The fluorescence in a disk-shaped region of interest is monitored before bleaching and during the recovery phase. The three pictures show the pole of the GUV delineated by the red circle, the region of interest delineated by the white circle (here, the diameter is 5 μm) before bleach, right after bleach and after recovery from left to right respectively. The graph shows the raw fluorescence recovery in the region of interest (blue points), the three data-point rolling average (orange) and the fit of the rolling average using the equation indicated in the Materials and methods section. (B) The square of the diameter of the region of interest is plotted vs. the raw values of  $\tau$  (multiplied by a factor of 16), from the fit of 6 different FRAP experiments (three experiments performed twice on two different days). The slope is equal to the diffusion coefficient,  $D$ , here  $0.69 \mu\text{m}^2/\text{s}$ . At the bottom, the extreme values of  $D$  obtained from the data point (red lines) are indicated. Hence,  $D = 0.7 \pm 0.3 \mu\text{m}^2/\text{s}$ .

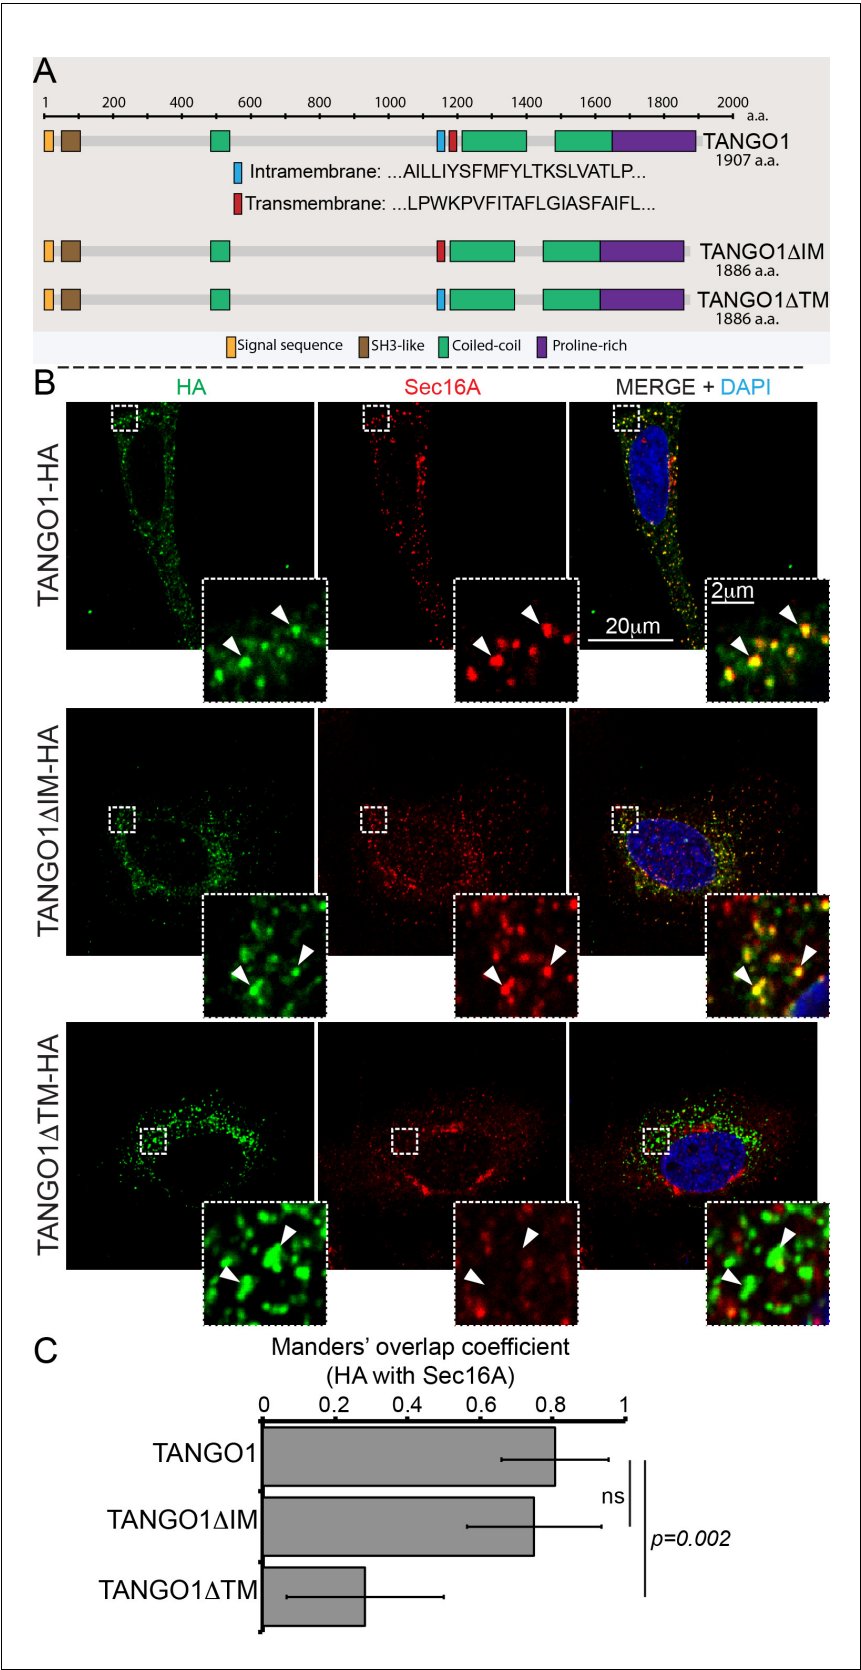

**Figure 3.** Deletion of the intramembrane helix has no effect on TANGO1 recruitment to ERES. (A) Schematic of TANGO1 constructs used in this study, showing the sequence of the transmembrane and intramembrane helices. Figure 3 continued on next page

*Figure 3 continued*

(B) The three HA-epitope tagged constructs were expressed in 2H5 cells, which were then imaged for HA and Sec16A. Scale bar: 20 $\mu$ m, Inset: 2 $\mu$ m. (C) Plot of the Manders' colocalization coefficients of the extent of overlap of HA (TANGO1 constructs) with Sec16A.

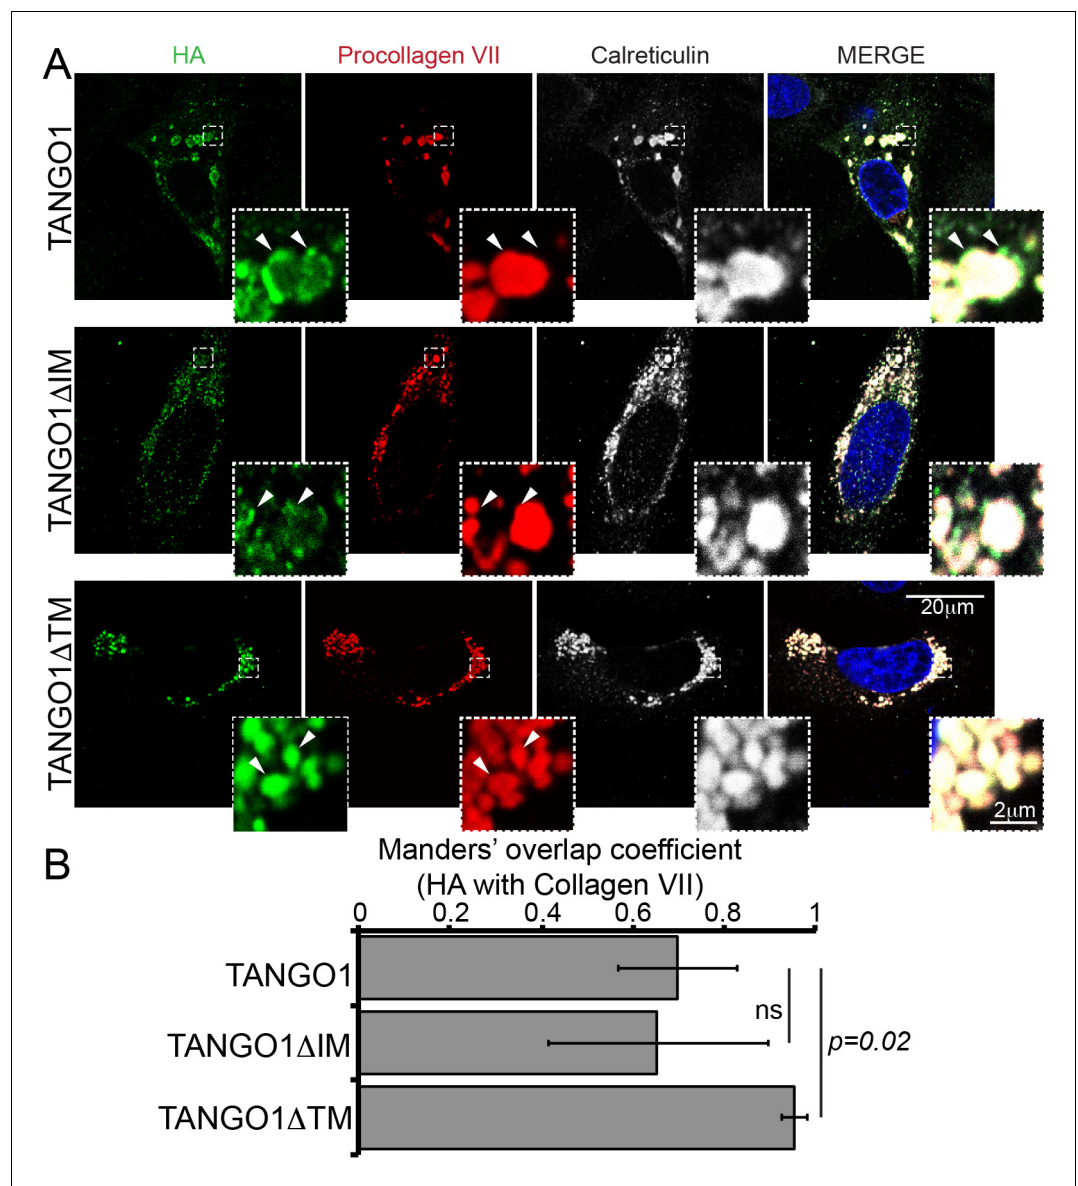

**Figure 3—figure supplement 1.** Deletion of the intramembrane has no effect on TANGO1 recruitment to collagen. (A) TANGO1 or TANGO1ΔIM (green) form distinct puncta at procollagen VII (red) accumulations in the ER (ER marker calreticulin in white). TANGO1 lacking a transmembrane domain (TANGO1ΔTM) does not form ERES puncta at procollagen VII accumulations; instead it uniformly coats the collagen. Arrowheads indicate representative features in each channel. Scale bar: 20 μm, Inset: 2 μm. (B) Plot of the Manders' colocalization coefficients of the extent of overlap of HA (TANGO1 constructs) with procollagen VII. ns: not significant,  $p<0.02$  by Student's *t* test.

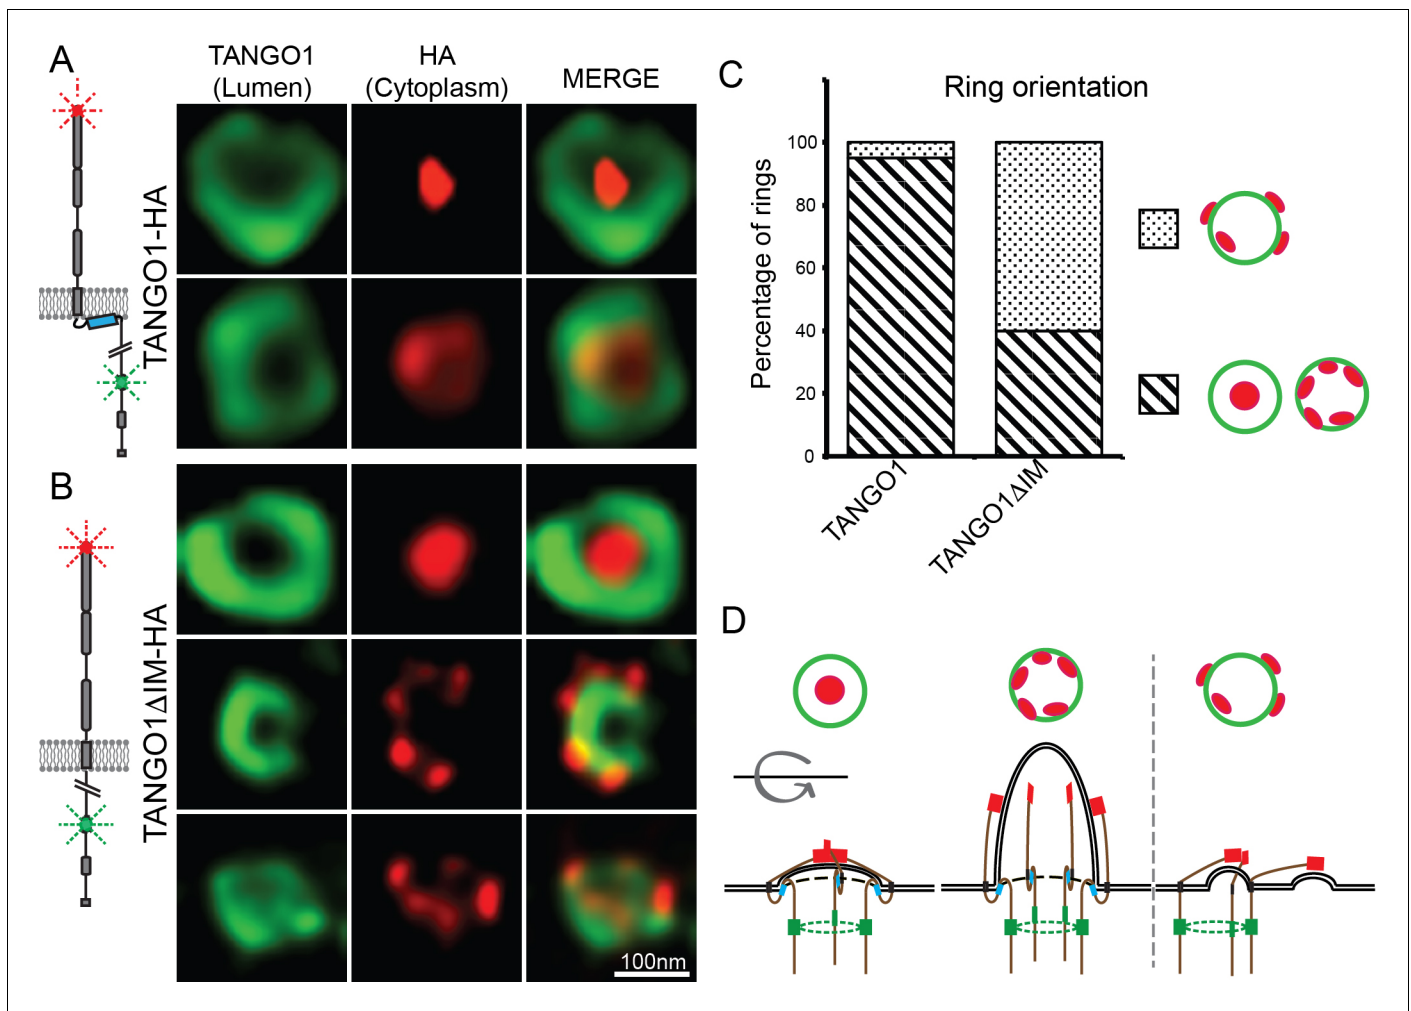

**Figure 4.** TANGO1 intramembrane helix orients a ring of TANGO1 molecules. Two different epitopes on TANGO1 are visualised concomitantly. The ER-luminal epitope in green, the c-terminal HA epitope in red (**A**) TANGO1, (**B**) TANGO1ΔIM. (**C**) Quantification of the number of rings observed in each configuration. Regions with diagonal bars refer to rings with HA signal (red) contained within the luminal signal (green), while the dotted region refers to rings with at least some HA signal (red) contained outside, but apposed to, the luminal signal (green). (**D**) Schematic model of the different configurations of TANGO1 molecules in a ring.



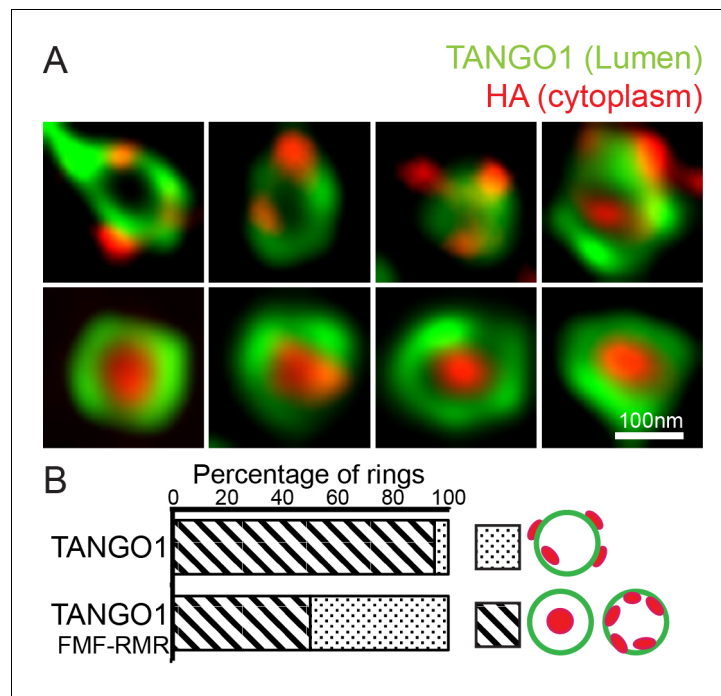

**Figure 4—figure supplement 1.** Targeted disruption of the intramembrane helix, replacing two phenylalanines with arginines (TANGO1-FMF-RMR), mimics the effect of deleting the helix entirely. **(A)** TANGO1 Luminal epitope (green), when visualised as a ring could have the C-terminal HA epitope (red) randomly oriented with respect to the ring, or encircled entirely within the ring. **(B)** Quantification of the number of rings observed in each configuration. Regions with diagonal bars refer to rings with HA signal (red) contained entirely within the luminal signal (green), while the dotted region refers to rings with at least some HA signal (red) contained outside, but apposed to, the luminal signal (green).

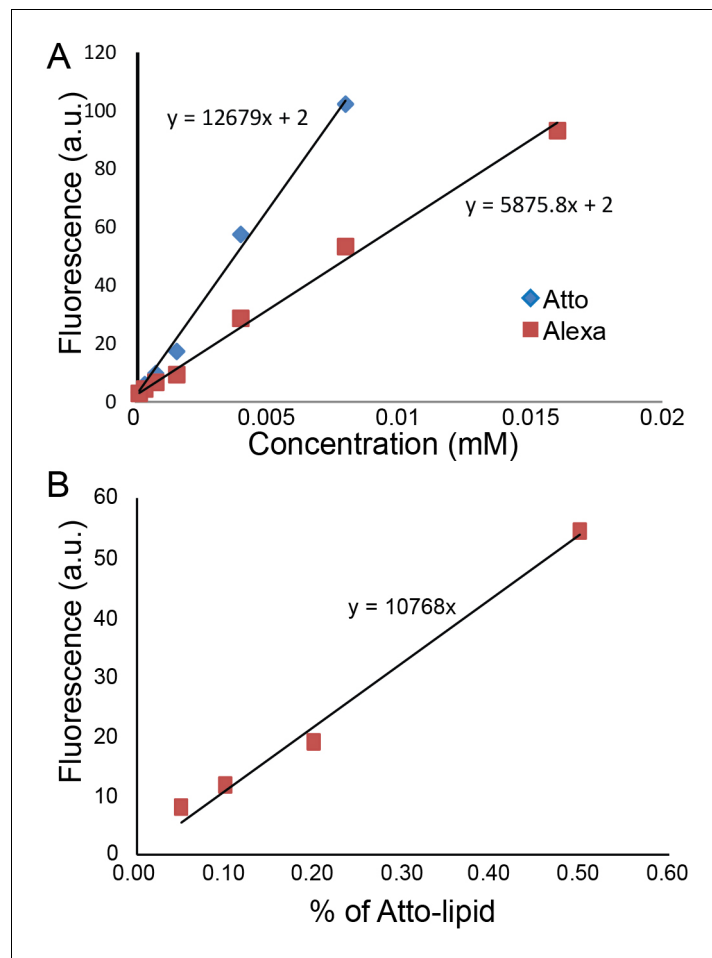

**Figure 5.** Quantification of protein concentration. (A) Alexa488 and Atto488 intensities in solution at different concentrations. (B) Atto488 lipid intensity increases linearly with concentration.

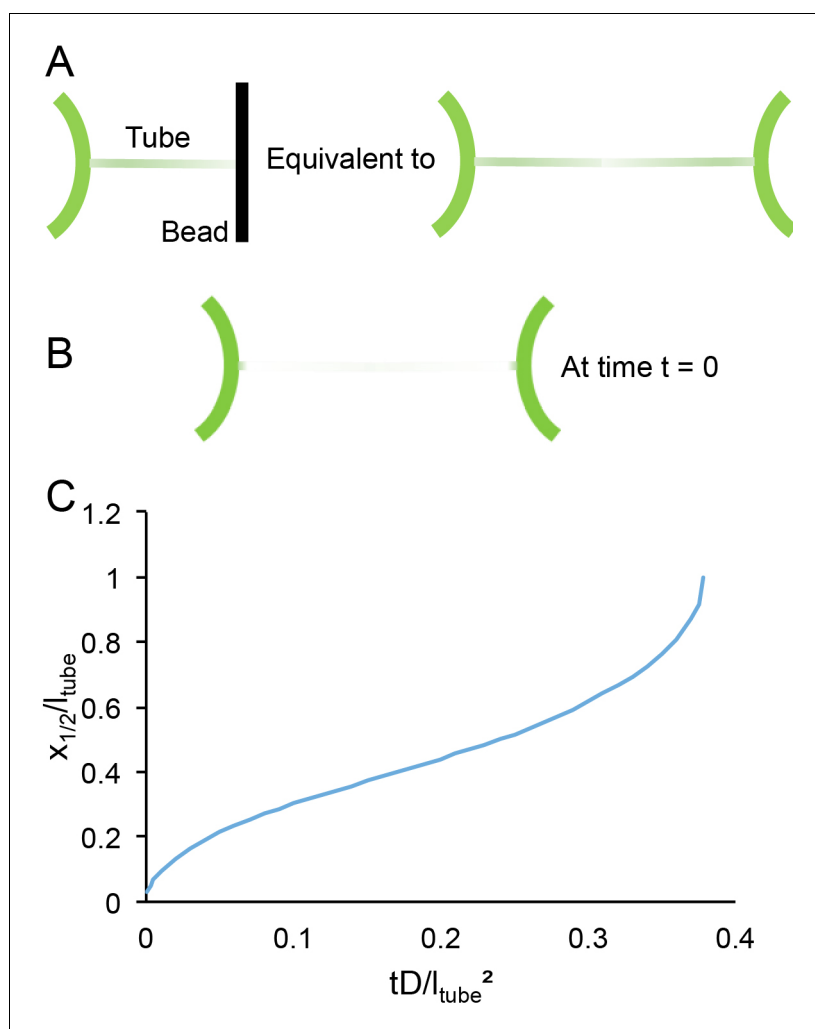

**Figure 6.** Time scales of lipid diffusion in the GUV-tube system. (A) Schematic of the system. (B) Schematic of system under boundary conditions at time  $t = 0$ . (C) Kinetics of recovery.
